# Supplementary material
Source: MDPI journal article supplement (https://www.mdpi.com/1424-2818/14/3/166)
Supplement: s1 [file s1]

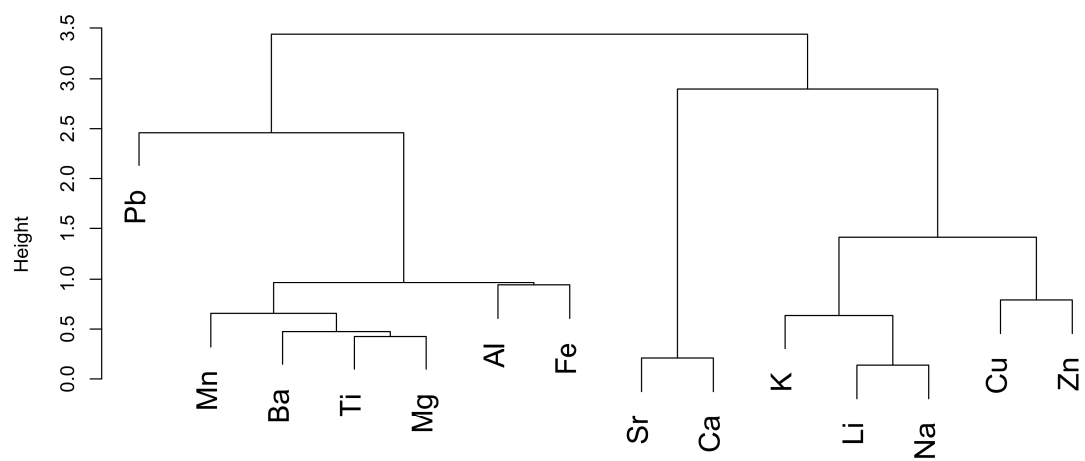

**Figure S1.** Dendrogram of cluster analysis for 14 leachable elements in the Lingshui Pond sediment core.

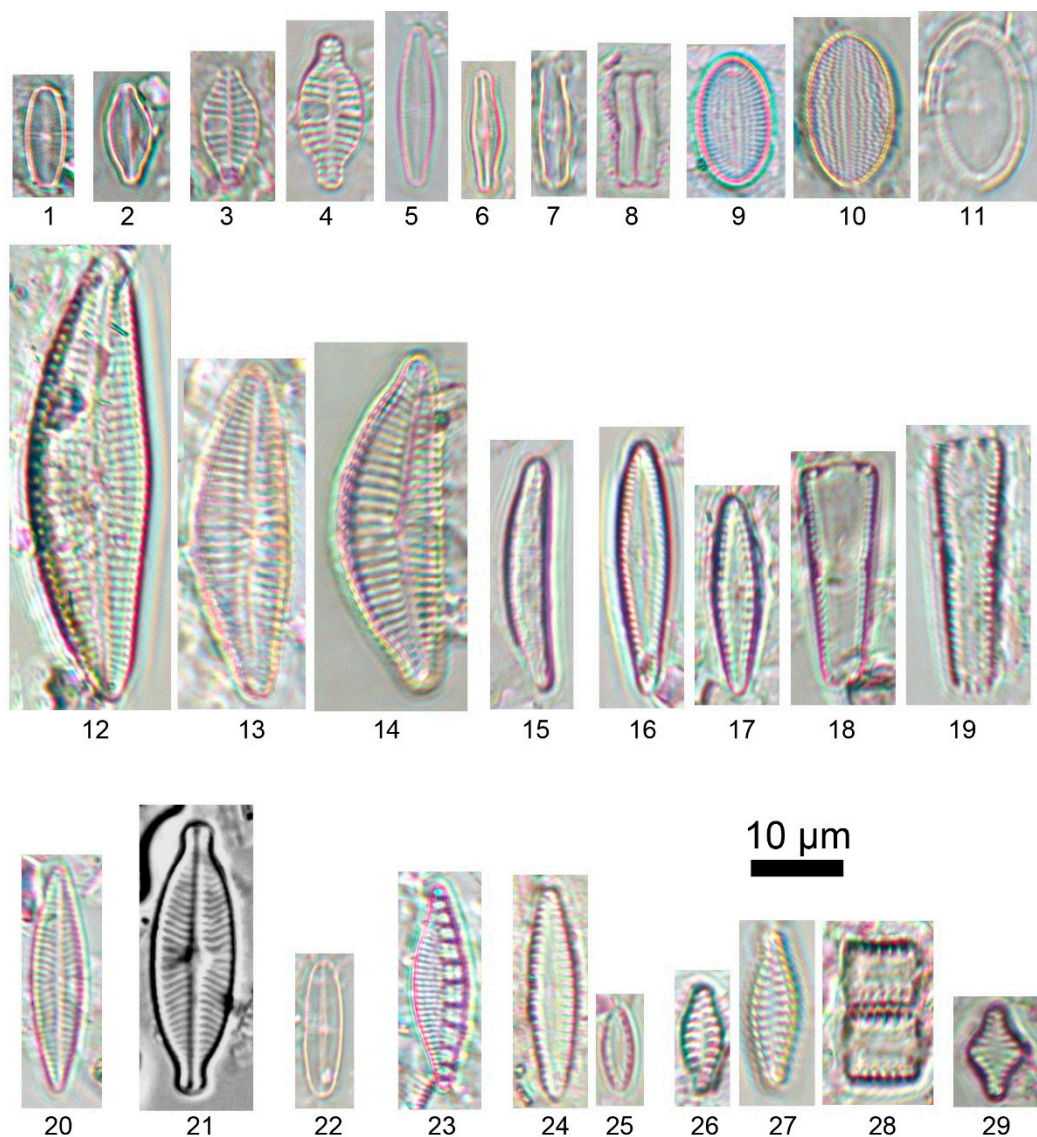

Figure S2. . Light microscope images of the 14 main diatom taxa in the Lingshui Pond sediment core. 1-2: *Achnanthes exigua*; 3-4: *Achnanthes lanceolata*; 5-8: *Achnanthes minutissima*; 9-11: *Cocconeis placentula*; 12-14: *Cymbella affinis*; 15: *Eunotia minor*; 16-19: *Gomphonema clevei*; 20: *Navicula cryptotenella*; 21: *Navicula elginensis*; 22: *Navicula minima*, 23: *Nitzschia sinuata* var. *delognei*; 24-25: *Pseudostaurosira brevistriata*; 26-28: *Punctastriata linearis*; 29: *Staurosira construens*.

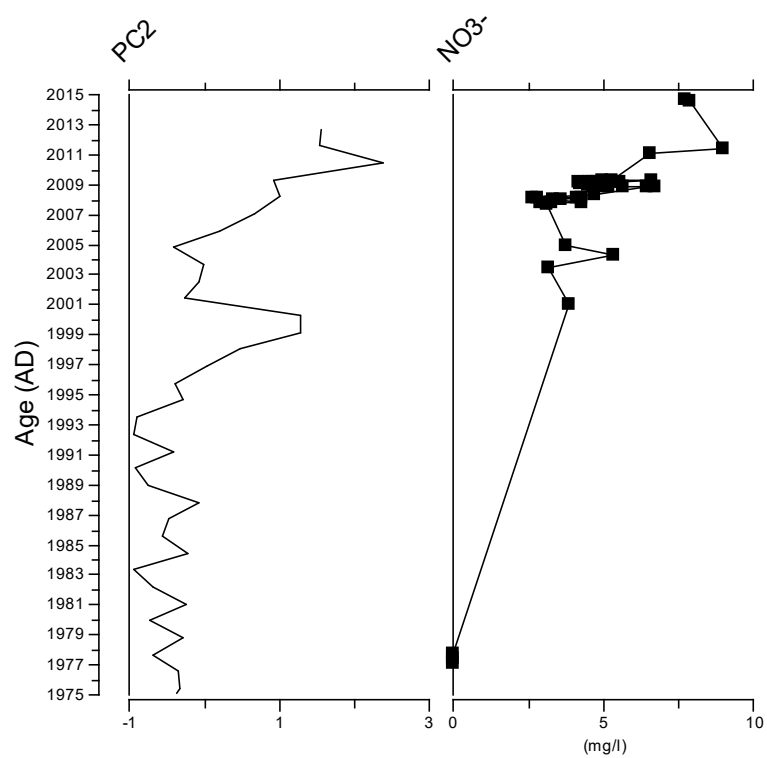

**Figure S3.** Spatial variation of diatom PC2 from the sediment records and NO<sub>3</sub><sup>-</sup> concentration of spring water in Lingshui Pond.

**Table S1.** Checklist of diatom species found in the Lingshui Pond sediment core.

| No. | Species name                                         | No. | Species name                                  | No. | Species name                                  |
|-----|------------------------------------------------------|-----|-----------------------------------------------|-----|-----------------------------------------------|
| 1   | <i>Achnanthes exigua</i>                             | 37  | <i>Gomphonema italicum</i>                    | 73  | <i>Nitzschia parvuloides</i>                  |
| 2   | <i>Achnanthes joursacense</i>                        | 38  | <i>Gomphonema parvulum</i>                    | 74  | <i>Nitzschia sinuata</i> var. <i>delognei</i> |
| 3   | <i>Achnanthes lanceolata</i>                         | 39  | <i>Gomphonema pseudoaugur</i>                 | 75  | <i>Nitzschia tabellaria</i>                   |
| 4   | <i>Achnanthes minutissima</i>                        | 40  | <i>Gomphonema subclavatum</i>                 | 76  | <i>Pinnularia borealis</i>                    |
| 5   | <i>Achnanthes rupestroides</i>                       | 41  | <i>Gyrosigma procerum</i>                     | 77  | <i>Pinnularia gibba</i>                       |
| 6   | <i>Achnanthidium gracillimum</i>                     | 42  | <i>Gyrosigma scalproides</i>                  | 78  | <i>Pinnularia microstauron</i>                |
| 7   | <i>Amphipleura pellucida</i>                         | 43  | <i>Hantzschia amphioxys</i>                   | 79  | <i>Pinnularia schoenfelderi</i>               |
| 8   | <i>Amphora veneta</i>                                | 44  | <i>Melosira varians</i>                       | 80  | <i>Pseudostaurosira brevistriata</i>          |
| 9   | <i>Aulacoseira ambigua</i>                           | 45  | <i>Navicula notha</i>                         | 81  | <i>Punctastriata linearis</i>                 |
| 10  | <i>Bacillaria paxillifer</i>                         | 46  | <i>Navicula protractoides</i>                 | 82  | <i>Reimeria lacusidahoensis</i>               |
| 11  | <i>Caloneis tenuis</i>                               | 47  | <i>Navicula amphiceropsis</i>                 | 83  | <i>Rhopalodia gibba</i>                       |
| 12  | <i>Cocconeis placentula</i>                          | 48  | <i>Navicula atomus</i>                        | 84  | <i>Rhopalodia operculata</i>                  |
| 13  | <i>Cyclotella meneghiniana</i>                       | 49  | <i>Navicula bacillum</i>                      | 85  | <i>Stauroneis anceps</i>                      |
| 14  | <i>Cyclotella praetermissa</i>                       | 50  | <i>Navicula capitatoradiata</i>               | 86  | <i>Stauroneis anceps</i> var. <i>linearis</i> |
| 15  | <i>Cymbella affinis</i>                              | 51  | <i>Navicula cincta</i>                        | 87  | <i>Stauroneis smithii</i>                     |
| 16  | <i>Cymbella cuspidata</i>                            | 52  | <i>Navicula concentrica</i>                   | 88  | <i>Staurosira construens</i>                  |
| 17  | <i>Cymbella cymbiformis</i>                          | 53  | <i>Navicula confervacea</i>                   | 89  | <i>Surirella angusta</i>                      |
| 18  | <i>Cymbella delicatula</i>                           | 54  | <i>Navicula contenta</i>                      | 90  | <i>Surirella bifrons</i>                      |
| 19  | <i>Cymbella leptoceros</i>                           | 55  | <i>Navicula cryptotenella</i>                 | 91  | <i>Synedra ulna</i>                           |
| 20  | <i>Cymbella tumida</i>                               | 56  | <i>Navicula cuspidata</i>                     |     |                                               |
| 21  | <i>Cymbella turgidula</i>                            | 57  | <i>Navicula elginensis</i>                    |     |                                               |
| 22  | <i>Diploneis elliptica</i>                           | 58  | <i>Navicula heuflerii</i>                     |     |                                               |
| 23  | <i>Diploneis oblongella</i>                          | 59  | <i>Navicula hustedtii</i>                     |     |                                               |
| 24  | <i>Discostella stelligera</i>                        | 60  | <i>Navicula laterostrata</i>                  |     |                                               |
| 25  | <i>Encyonema leei</i>                                | 61  | <i>Navicula minima</i>                        |     |                                               |
| 26  | <i>Encyonema mesianum</i>                            | 62  | <i>Navicula mutica</i>                        |     |                                               |
| 27  | <i>Encyonema minutum</i>                             | 63  | <i>Navicula pseudosilicula</i>                |     |                                               |
| 28  | <i>Encyonema silesiacum</i>                          | 64  | <i>Navicula pupula</i>                        |     |                                               |
| 29  | <i>Epithemia adnata</i>                              | 65  | <i>Navicula scutelloides</i>                  |     |                                               |
| 30  | <i>Eunotia minor</i>                                 | 66  | <i>Navicula seminulum</i>                     |     |                                               |
| 31  | <i>Eunotia pectinalis</i>                            | 67  | <i>Navicula viridula</i> var. <i>linearis</i> |     |                                               |
| 32  | <i>Fragilaria capucina</i>                           | 68  | <i>Neidium affine</i> var. <i>longiceps</i>   |     |                                               |
| 33  | <i>Frustulia rhomboides</i> var. <i>crassinervia</i> | 69  | <i>Nitzschia angustata</i>                    |     |                                               |
| 34  | <i>Gomphonema clevei</i>                             | 70  | <i>Nitzschia fonticola</i>                    |     |                                               |
| 35  | <i>Gomphonema gracile</i>                            | 71  | <i>Nitzschia levidensis</i>                   |     |                                               |
| 36  | <i>Gomphonema grovei</i> var. <i>lingulatum</i>      | 72  | <i>Nitzschia palea</i>                        |     |                                               |

**Table S2.** Scores of PCA and environmental conditions for the selected diatom species in the Lingshui Pond sediment core.

| Species name                                  | PC1   | PC2   | Environmental indication |                        |                       |
|-----------------------------------------------|-------|-------|--------------------------|------------------------|-----------------------|
|                                               |       |       | pH                       | Trophic state          | Habitat               |
| Variables (%)                                 | 47.73 | 13.91 |                          |                        |                       |
| <i>Achnanthes exigua</i>                      | -0.17 | 0.50  | alkaliphious             | oligo- to eutraphentic | benthic               |
| <i>Achnanthes lanceolata</i>                  | -0.33 | 0.80  | alkaliphious             | eutraphentic           | benthic               |
| <i>Achnanthes minutissima</i>                 | 0.01  | 0.26  | circumneutral            | oligo- to eutraphentic | benthic               |
| <i>Cocconeis placentula</i>                   | 2.33  | 0.56  | alkaliphious             | eutraphentic           | epiphytic             |
| <i>Cymbella affinis</i>                       | -0.07 | -0.53 | alkaliphious             | eutraphentic           | epiphytic             |
| <i>Eunotia minor</i>                          | -0.18 | -0.61 | acidophilous             | oligotraphentic        | benthic               |
| <i>Gomphonema clevei</i>                      | 0.83  | -0.62 | circumneutral            | meso-eutraphentic      | epiphytic             |
| <i>Navicula cryptotenella</i>                 | -0.46 | -0.58 | alkaliphious             | oligo- to eutraphentic | benthic               |
| <i>Navicula elginensis</i>                    | -0.52 | -0.57 | alkaliphious             | eutraphentic           | benthic               |
| <i>Navicula minima</i>                        | -0.38 | 0.41  | alkaliphious             | eutraphentic           | benthic               |
| <i>Nitzschia sinuata</i> var. <i>delognei</i> | -0.13 | 0.40  | alkaliphious             | meso-eutraphentic      | benthic               |
| <i>Pseudostaurosira brevistriata</i>          | -1.30 | 0.16  | alkaliphious             | oligo- to eutraphentic | benthic-to planktonic |
| <i>Punctastriata linearis</i>                 | -1.60 | 0.26  | alkaliphious             | oligo- to eutraphentic | benthic-to planktonic |
| <i>Staurosira construens</i>                  | -0.94 | 0.34  | alkaliphious             | meso-eutraphentic      | benthic-to planktonic |
